# Supplementary material
Source: publisher site journal article supplement (https://www.spandidos-publications.com/3186/downloadSupplementary)

Figure S1. Analysis of the mRNA expression of *CD9* in the SUP-B15 cells transduced with PHY-310 lentiviral vector containing shRNA targeting *CD9* (shCD9) or blank PHY-310 vector (shControl) by reverse transcription-quantitative PCR. Data are presented as the mean  $\pm$  SD of three independent experiments. \* $P < 0.05$  vs. SUP-B15-shControl group.

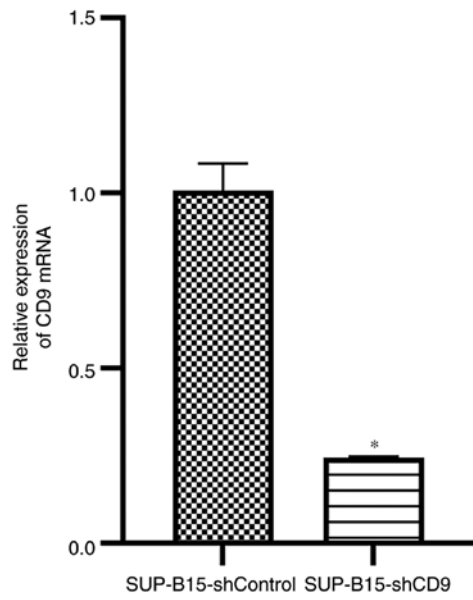

Figure S2. Analysis of CD9 protein expression in the 293T cells transfected with *CD9* expression plasmid (pcDNA3.1-MYC-CD9) or empty plasmid (pcDNA3.1-Flag-MYC) by western blotting.  $\beta$ -actin was used as the loading control.

Cells transfected with  
different plasmid

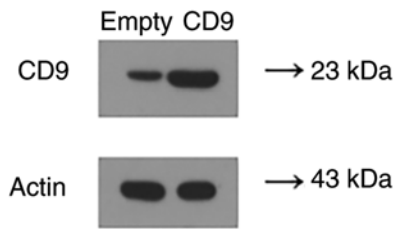

Figure S3. Analysis of PI3K-p85 $\alpha$  protein expression in the 293T cells transfected with *PI3K-p85 $\alpha$*  expression plasmid (pcDNA3.1-HA-p85 $\alpha$ ) or empty plasmid (pcDNA3.1-Flag-HA) by western blotting.  $\beta$ -actin was used as the loading control.

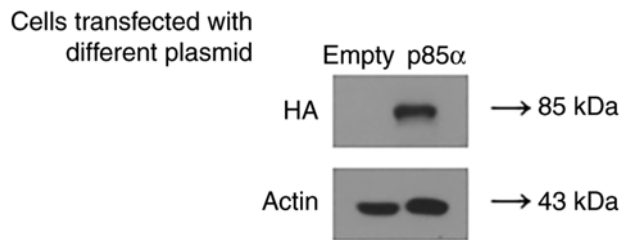

Figure S4. Analysis of PI3K-p85 $\beta$  protein expression in the 293T cells transfected with *PI3K-p85 $\beta$*  expression plasmid (pcDNA3.1-HA-p85 $\beta$ ) or empty plasmid (pcDNA3.1-Flag-HA) by western blotting.  $\beta$ -actin was used as the loading control.

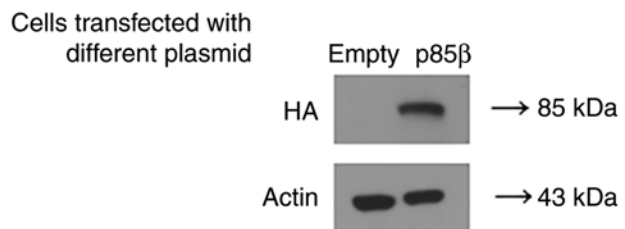

Supplement: Supplementary file 1 [file downloadSupplementary]
